# Supplementary material for: Indium Nitrite (InN)-Based Ultrasensitive and Selective Ammonia Sensor Using an External Silicone Oil Filter for Medical Application
Source: MDPI journal article supplement (doi:10.3390/s18113887), 2018-11-11
Supplement: s1 [file s1]

# Indium nitrite (InN)-based ultrasensitive and selective ammonia sensor using an external silicone oil filter for medical application

Sujeet Kumar Rai<sup>1</sup>, Kun-Wei Kao<sup>1</sup>, Shanjgr Gwo,<sup>3</sup> Ashish Agarwal,<sup>1</sup> Wei Da Lin<sup>2</sup>, J. Andrew Yeh<sup>1,2\*</sup>

<sup>1</sup>Institute of Nano engineering and Microsystems, National Tsing Hua University, No. 101, Section 2, Kuang-Fu Road, Hsinchu 30013, Taiwan.

<sup>2</sup>Institute of Electronics Engineering, National Tsing Hua University, Hsinchu 30013, Taiwan.

<sup>3</sup>Department of Physics, National Tsing Hua University, Hsinchu 30013, Taiwan.

\*Correspondence and requests for materials should be addressed to J.A.Y.

(E-mail: jayeh@mx.nthu.edu.tw)

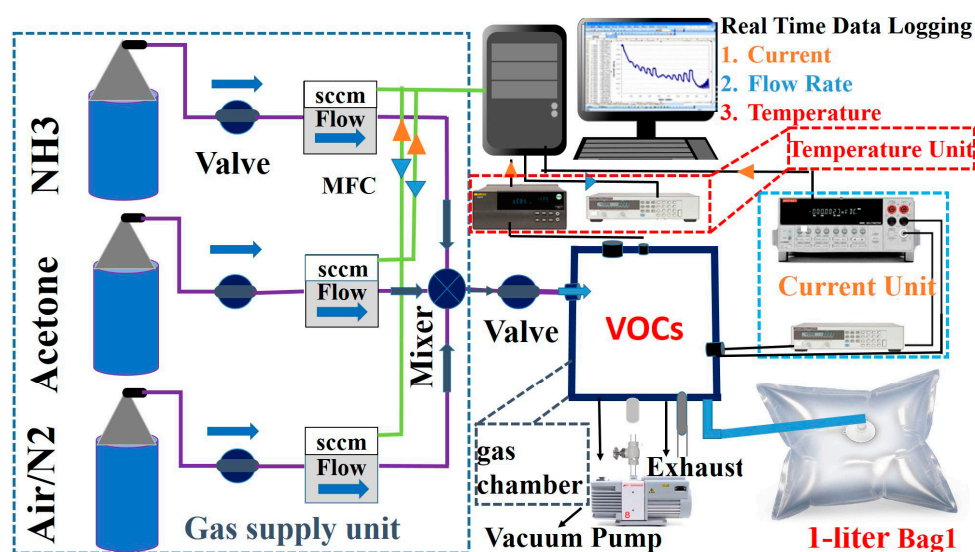

Figure S1. Acetone gas sampling in 1-liter bag1 by using gas chamber system.

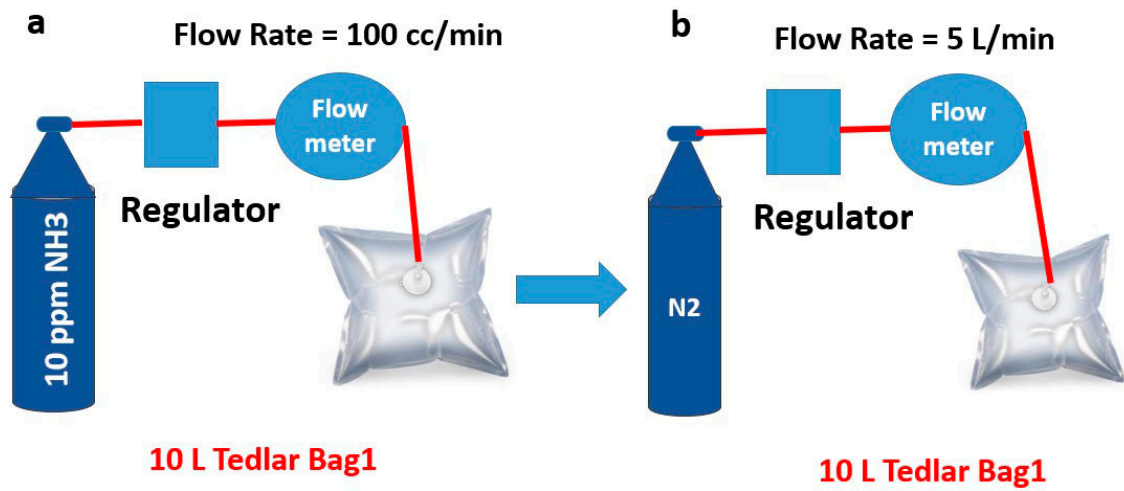

**Figure S2.** (a) Sampling of 0.4 ppm ammonia gas in 10-liter of Tedlar bag1 (b) N<sub>2</sub> dilution system.

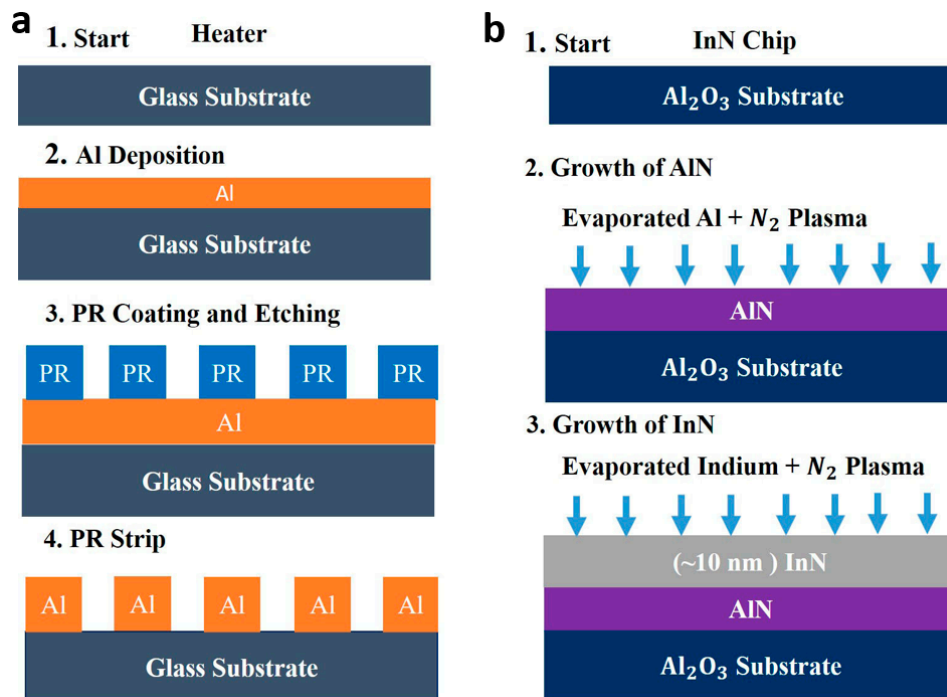

**Figure S3.** (a) Fabrication process of heater (b) Fabrication process of InN Epilayer.
